# Supplementary material for: Retinal Vascular Occlusion after COVID-19 Vaccination: More Coincidence than Causal Relationship? Data from a Retrospective Multicentre Study
Source: MDPI journal article supplement (doi:10.3390/jcm11175101), 2022-08-30
Supplement: s1 [file s1]

**Supplemental Table S1: Time interval between last COVID-19 vaccination and time-point of diagnosis of retinal vascular occlusion (n=410; 321 vaccinated patients and 89 patients with no vaccination; missing data: 11).**

| Vaccination time point | <2 weeks   | 2-4 weeks  | 4-6 weeks  | >6 weeks    | No vaccination |
|------------------------|------------|------------|------------|-------------|----------------|
| All patients           | 70 (21.8%) | 85 (26.5%) | 44 (13.7%) | 122 (38.0%) | 89             |
| CRVO                   | 22         | 27         | 11         | 38          | 20             |
| BRVO                   | 14         | 13         | 10         | 19          | 18             |
| CRAO                   | 5          | 9          | 4          | 25          | 13             |
| BRAO                   | 15         | 12         | 9          | 17          | 10             |
| AION                   | 14         | 24         | 10         | 23          | 28             |

**Supplemental Table S2: Characteristics of the study subjects and population-based GHS controls in the case-control study approach.**

|                                           | Cases          | Controls  |
|-------------------------------------------|----------------|-----------|
| n                                         | 327            | 327       |
| Age [years]                               | 64.8 ± 12.1    | 64.4±11.6 |
| Sex [female]                              | 43.1%          | 43.1%     |
| Arterial hypertension [yes]               | 63.2%          | 59.3%     |
| Diabetes [yes]                            | 18.3%          | 11.0%     |
| Obesity [yes]                             | 20.2%          | 21.7%     |
| COVID-19 vaccination status               |                |           |
| Vaccination within the last 4 weeks [yes] | 41.6%          | 38.2%     |
| CRVO/BRVO/CRAO/BRAO/AION                  | 93/63/39/47/85 | -/-/-/-/- |

CRVO= Central Retinal Vein Occlusion; BRVO= Branch Retinal Vein Occlusion; CRAO= Central Retinal Artery Occlusion; BRAO= Branch Retinal Artery Occlusion; AION= Anterior Ischaemic Optic Neuropathy

**Supplemental Table S3: Time-dependent distribution of vaccination stratified for different COVID-19 vaccines prior to onset of symptoms.**

|                                           | <2 weeks | 2-4 weeks | 4-6 weeks | >6 weeks |
|-------------------------------------------|----------|-----------|-----------|----------|
| ChadOx1/ <i>AstraZeneca</i>               | 14       | 21        | 3         | 17       |
| BNT162b2/<br><i>BioNTech</i>              | 45       | 54        | 33        | 83       |
| mRNA-1273/ <i>Moderna</i>                 | 5        | 5         | 3         | 7        |
| Ad26.COV2.S/ <i>Johnson &amp; Johnson</i> | 6        | 2         | 1         | 2        |

N=22 missing data on type of vaccination and further n=9 with missing data on date of vaccination

### Supplemental Material: Financial Disclosures

- Nicolas Feltgen.: Consultant: Alimera Sciences, Chiesi, Novartis, Roche  
Speaker: Allergan/Abbvie, Alimera, Apellis, Bayer, Heidelberg Engineering, Novartis, Roche
- Thomas Ach: Speaker: Bayer, Novartis, Roche, Apellis; Research grants: Nidek, Novartis.
- Focke Ziemssen: Consultant: Alimera, Allergan/Abbvie, Bayer Healthcare, Boehringer-Ingelheim, Roche/Genentech, NovoNordisk, MSD, Oxurion  
Speaker: Allergan/Abbvie, Bayer Healthcare, CME Health, Novartis, ODOS, Roche
- Carolin Quante: none
- Marc Schargus: Consultant: Allergan/Abbvie, Novartis, iStar Medical  
Speaker: Bayer Healthcare, Allergan Abbvie, Novartis
- Alexander Schuster: holds the professorship for ophthalmic healthcare research endowed by “Stiftung Auge” and financed by “Deutsche Ophthalmologische Gesellschaft” and “Berufsverband der Augenärzte Deutschlands e.V. He receives research support from Allergan/Abbvie, Bayer Healthcare, Heidelberg Engineering, and Novartis.
- Oliver Gross: Consultant for Sanofi US Services Inc./Genzyme/Regulus Therapeutics; Roche; Boehringer Ingelheim; Reata Pharmaceuticals; ONO-Pharmaceutical Co. Ltd.; Codon-X Therapeutics Inc.; Bayer AG; Novartis; Galapagos;  
Advisory committee for Sanofi US Services Inc./Genzyme/Regulus Therapeutics; Roche; Boehringer Ingelheim; Reata Pharmaceuticals
- Alaa Din Abdin: none
- Sabine Aisenbrey: none
- Martin C. Bartram: none
- Marcus Blum: Consultant: Carl Zeiss Meditec, Rheacell Speaker: Allergan/Abbvie, Fielmann
- Claudia Brockmann: Member of Vision Academy, Bayer Healthcare
- Stefan Dithmar: none
- Wilko Friedrichs: none
- Rainer Guthoff: Registration fee reimbursement by Bayer AG and DORC, Speaker Hoffmann La Roche.
- Lars-Olof Hattenbach: Dr. Hattenbach reports grants and personal fees from Novartis Pharma GmbH; grants and personal fees from Bayer AG; personal fees from Pharm Allergan GmbH; grants

and personal fees from Roche; grants from Apellis; and grants from Chengdu Kanghong Biotech Co., Ltd. outside the submitted work.

- Susanne Kaskel-Paul: none
- Ramin Khoramnia: RK reports grants from Chengdu Kanghong; grants, personal fees, and nonfinancial support from Alimera, Bayer, Novartis and Roche, personal fees, and nonfinancial support from Allergan and Heidelberg Engineering outside the submitted work.
- Julian Klaas: receives ongoing speaker honoraria from Novartis GmbH
- Tim U. Krohne, Financial support of research projects: Bayer, Novartis. Recipient of lecture fees: Alimera Sciences, Allergan, Bayer, Heidelberg Engineering, Novartis, Roche. Consultant: Alimera Sciences, Bayer, Novartis, Roche.
- Albrecht Lommatzsch: Consultant: Novartis, Bayer  
Speaker: Bayer vital, Novartis, Roche, Zeiss, Apellis
- Sabine Lueken: none
- Mathias Maier: none
- Lina Nassri: none
- Thien An Nguyen-Dang: none
- Viola Radeck: none
- Saskia Rau: Speaker Allergan/Abbvie, Alimera, Novartis, Bayer
- Johann Roider: Speaker: GlaxoSmithKline, Novartis
- Dirk Sandner: Consultant: Alimera Sciences, Allergan/Abbvie, Bayer Healthcare Novartis, GlaxoSmithKline, Roche  
Speaker: Alimera Sciences, Allergan/Abbvie, Bayer Healthcare, GlaxoSmithKline, Novartis, MSD, Roche, Takeda
- Laura Schmalenberger: none
- Irene Schmidtmann:
- Florian Schubert: none
- Helena Siegel:
- Martin S. Spitzer: Consultant: Allergan/Abbvie, Bayer Healthcare, Neurogene, Novartis,  
Speaker: Allergan/Abbvie, Bayer Healthcare, Boehringer Ingelheim, GSK, Novartis, ODOS, Takeda
- Andreas Stahl: Consultant: Alcon, Apellis, Bayer, Novartis, Roche  
Speaker: Allergan, Bayer, Novartis
- Julia V. Stingl: none
- Felix Treumer: none
- Arne Viestenz: none
- Joachim Wachtlin: Consultant: Novartis, Bayer Speaker: Alcon, Allergan, Bayer, Novartis
- Armin Wolf: Consultant: Alimera, Allergan/Abbvie, Bayer Healthcare, Boehringer-Ingelheim, Roche/Genentech, Santen, Zeiss  
Speaker: Allergan/Abbvie, Bayer Healthcare, Novartis, Optos, Oertli Instruments, Roche, Zeiss
- Julian Zimmermann: none

## **Supplemental Material: Participating centres**

## Participating Centres

- Clinic of Ophthalmology, University Medical Centre Goettingen, Goettingen, Germany.
- Department of Ophthalmology, University Leipzig, Leipzig, Germany; Centre for Ophthalmology, University Eye Hospital Tübingen, Tübingen, Germany
- Clinic of Nephrology and Rheumatology, University Medical Centre Goettingen, Goettingen, Germany.
- Department of Ophthalmology, University Hospital Bonn, Bonn, Germany.
- Department of Ophthalmology, Vivantes Health Network Ltd, Neukoelln Hospital, Berlin, Germany
- Department of Ophthalmology, Hannover Medical School, Hannover, Germany.
- Department of Ophthalmology, Helios Hospital Erfurt, Erfurt, Germany.
- Department of Ophthalmology, Universitätsmedizin Rostock, Rostock, Germany.
- Department of Ophthalmology, Helios HSK Wiesbaden, Wiesbaden, Germany
- Charlottenklinik Ophthalmology, Stuttgart, Germany.
- Department of Ophthalmology, Faculty of Medicine, University Hospital Duesseldorf, Dusseldorf, Germany.
- Department of Ophthalmology, Ludwigshafen Hospital, Ludwigshafen am Rhein, Germany.
- Department of Internal Medicine I, Asklepios Klinik Nord, Hamburg, Germany
- Department of Ophthalmology, Maerkische Kliniken GmbH, Lüdenscheid, Germany.
- The David J Apple Centre for Vision Research, Department of Ophthalmology, University Hospital Heidelberg, Heidelberg, Germany.
- Department of Ophthalmology, University Homburg/ Saar, Germany
- Department of Ophthalmology, University Hospital, LMU Munich, Germany
- Department of Ophthalmology, Faculty of Medicine and University Hospital of Cologne, University of Cologne, Cologne, Germany
- Department of Ophthalmology, St. Franziskus-Hospital, Muenster, Germany.
- Department of Ophthalmology, University of Luebeck, Luebeck, Germany.
- Ophthalmology Department, Hospital rechts der Isar, Technical University of Munich (TUM), Munich, Germany.
- Department of Ophthalmology, University Hospital RWTH Aachen, Germany.
- Praxis Prof. Laube, Duesseldorf, Germany.
- Department of Ophthalmology, University Hospital of Regensburg, Regensburg, Germany.
- Department of Ophthalmology, Charité-University Medicine Berlin, Corporate Member of Freie Universität Berlin, Humboldt- Universität zu Berlin and Berlin Institute of Health, Berlin, Germany
- Universitätsklinikum Schleswig-Holstein, Klinik für Ophthalmologie, Campus Kiel, Kiel, Germany.

- Department of Ophthalmology, Univ. Hospital Carl Gustav Carus, TU Dresden, Germany.
- Municipal Clinic Braunschweig, Germany.
- Institute of Medical Biostatistics, Epidemiology and Informatics, University Medical Center of the Johannes Gutenberg-University Mainz, Mainz, Germany
- Department of Ophthalmology, Phillips University of Marburg, Marburg, Germany
- Eye Center, Medical Centre-University of Freiburg, Faculty of Medicine, University of Freiburg, Freiburg im Breisgau, Germany.
- Department of Ophthalmology, University Medical Centre Hamburg-Eppendorf, Hamburg, Germany.
- Department of Ophthalmology, University Medical Centre Greifswald, Greifswald, Germany.
- Department of Ophthalmology, University Medical Centre of the Johannes Gutenberg-University Mainz, Mainz, Germany.
- Department of Ophthalmology, Klinikum Kassel, Kassel, Germany
- Department of Ophthalmology, Martin-Luther University Halle-Wittenberg, Halle (Saale) Germany.
- Department of Ophthalmology, Sankt-Gertrauden Krankenhaus, Berlin, Germany and MHB Medizinische Hochschule Brandenburg, Neuruppin, Germany
- Department of Ophthalmology, Ulm University Medical Centre, Ulm, Germany.
- Department of Ophthalmology, University of Muenster Medical Centre, Muenster, Germany.
- Asklepios Augenklinik Nord, Hamburg, Germany
- Department of Ophthalmology, University Hospital Duesseldorf, Heinrich Heine University Duesseldorf, Germany
- Department of Ophthalmology, University Medical Center of the Johannes Gutenberg-University Mainz, Mainz, Germany.
